# Supplementary material
Source: PubMed Central journal article supplement (PMC2901143)

## Supplementary Legends to Figures

### Supplementary Figure 1. ***IGF1* circulating levels among Caucasian prostate cancer cases and controls in the NCI Breast & Prostate Cancer Cohort Consortium.**

The upper panel provides descriptive statistics for measured *IGF1* circulating levels (ng/ml) among cases and controls across the cohorts and pooled. The lower panel is a box plot of  $\log_{10}$  transformed *IGF1* circulating levels for cases (blue) and controls (red) by cohort and pooled. The size of the boxes is proportional to the sample sizes. (Abbrev: SD=Standard deviation)

### Supplementary Figure 2. ***IGFBP3* circulating levels among Caucasian prostate cancer cases and controls in the NCI Breast & Prostate Cancer Cohort Consortium.**

The upper panel provides descriptive statistics for measured *IGFBP3* circulating levels (ng/ml) among cases and controls across the cohorts and pooled. The lower panel is a box plot of  $\log_{10}$  transformed *IGFBP3* circulating levels for cases (blue) and controls (red) by cohort and pooled. The size of the boxes is proportional to the sample sizes. (Abbrev: SD=Standard deviation)

Supplementary Figure 1

|           | ATBC<br>Serum |          | EPIC<br>Serum |          | HPFS<br>Plasma |          | MEC<br>Plasma |           | PHS<br>Plasma |          | PLCO<br>Serum |          | ALL      |          |
|-----------|---------------|----------|---------------|----------|----------------|----------|---------------|-----------|---------------|----------|---------------|----------|----------|----------|
|           | Control       | Case     | Control       | Case     | Control        | Case     | Control       | Case      | Control       | Case     | Control       | Case     | Control  | Case     |
| N         | 226           | 89       | 637           | 614      | 651            | 658      | 61            | 3         | 541           | 639      | 844           | 721      | 2,960    | 2,724    |
| Mean (SD) | 148 (52)      | 151 (53) | 175 (73)      | 178 (66) | 180 (57)       | 188 (57) | 184 (78)      | 193 (105) | 186 (71)      | 191 (75) | 207 (85)      | 212 (85) | 186 (74) | 192 (73) |
| 25%       | 114           | 109      | 122           | 130      | 141            | 147      | 142           | 132       | 137           | 137      | 147           | 149      | 135      | 139      |
| Median    | 140           | 147      | 162           | 169      | 175            | 183      | 175           | 134       | 174           | 173      | 194           | 198      | 173      | 180      |
| 75%       | 175           | 182      | 214           | 213      | 217            | 221      | 215           | 224       | 220           | 229      | 252           | 262      | 223      | 230      |

Ln IGF1 Circulating Levels by Case-Control Status Across Study and Overall

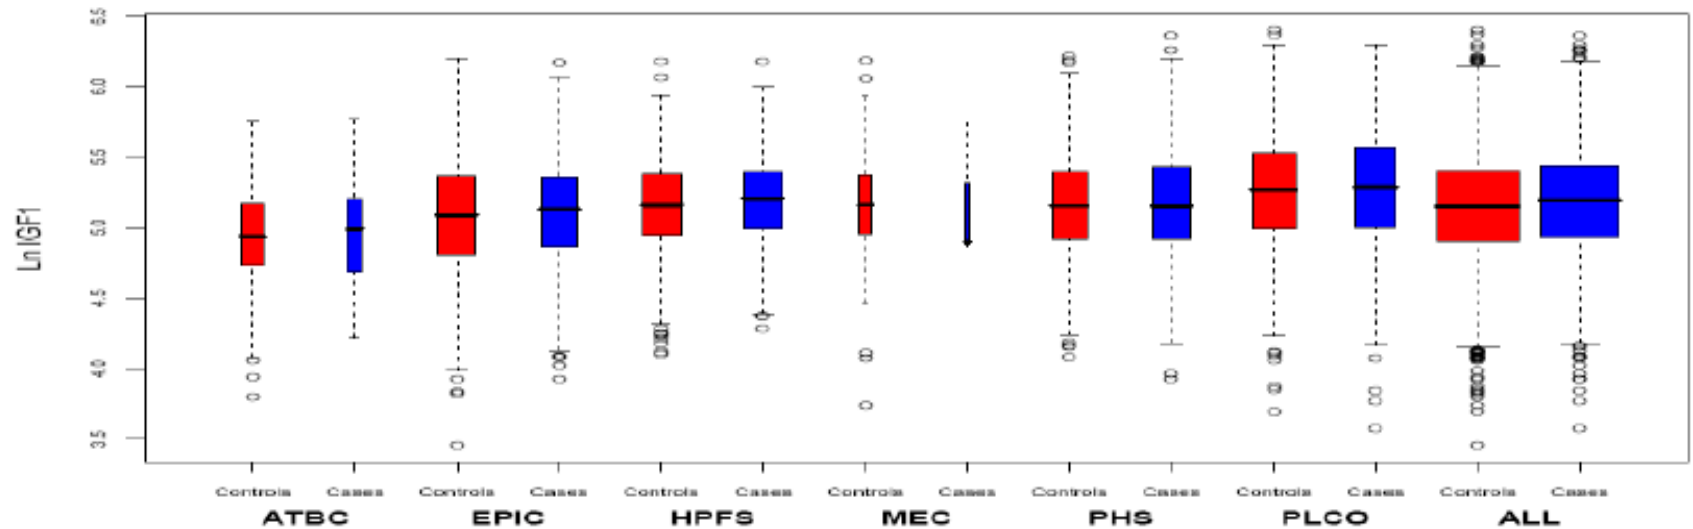

**Supplementary Figure 2**

|           | ATBC<br>Serum |            | EPIC<br>Serum |            | HPFS<br>Plasma |            | MEC<br>Plasma |             | PHS<br>Plasma |            | PLCO<br>Serum |             | ALL         |             |
|-----------|---------------|------------|---------------|------------|----------------|------------|---------------|-------------|---------------|------------|---------------|-------------|-------------|-------------|
|           | Control       | Case       | Control       | Case       | Control        | Case       | Control       | Case        | Control       | Case       | Control       | Case        | Control     | Case        |
| N         | 226           | 89         | 631           | 612        | 650            | 656        | 62            | 3           | 540           | 640        | 837           | 721         | 2,946       | 2,721       |
| Mean (SD) | 2426 (635)    | 2558 (741) | 3744 (754)    | 3793 (718) | 3375 (1015)    | 3473 (970) | 2758 (872)    | 3099 (1125) | 3137 (774)    | 3106 (725) | 4595 (1080)   | 4611 (1043) | 3671 (1135) | 3730 (1064) |
| 25%       | 1965          | 2015       | 3239          | 3288       | 2623           | 2728       | 2131          | 2469        | 2597          | 2583       | 3830          | 3890        | 2885        | 2955        |
| Median    | 2375          | 2528       | 3690          | 3774       | 3269           | 3377       | 2587          | 2744        | 3088          | 3070       | 4552          | 4558        | 3573        | 3629        |
| 75%       | 2891          | 3062       | 4227          | 4242       | 4060           | 4178       | 3380          | 3552        | 3657          | 3554       | 5229          | 5286        | 4399        | 4405        |

**Ln IGFBP3 Circulating Levels by Case-Control Status Across Study and Overall**

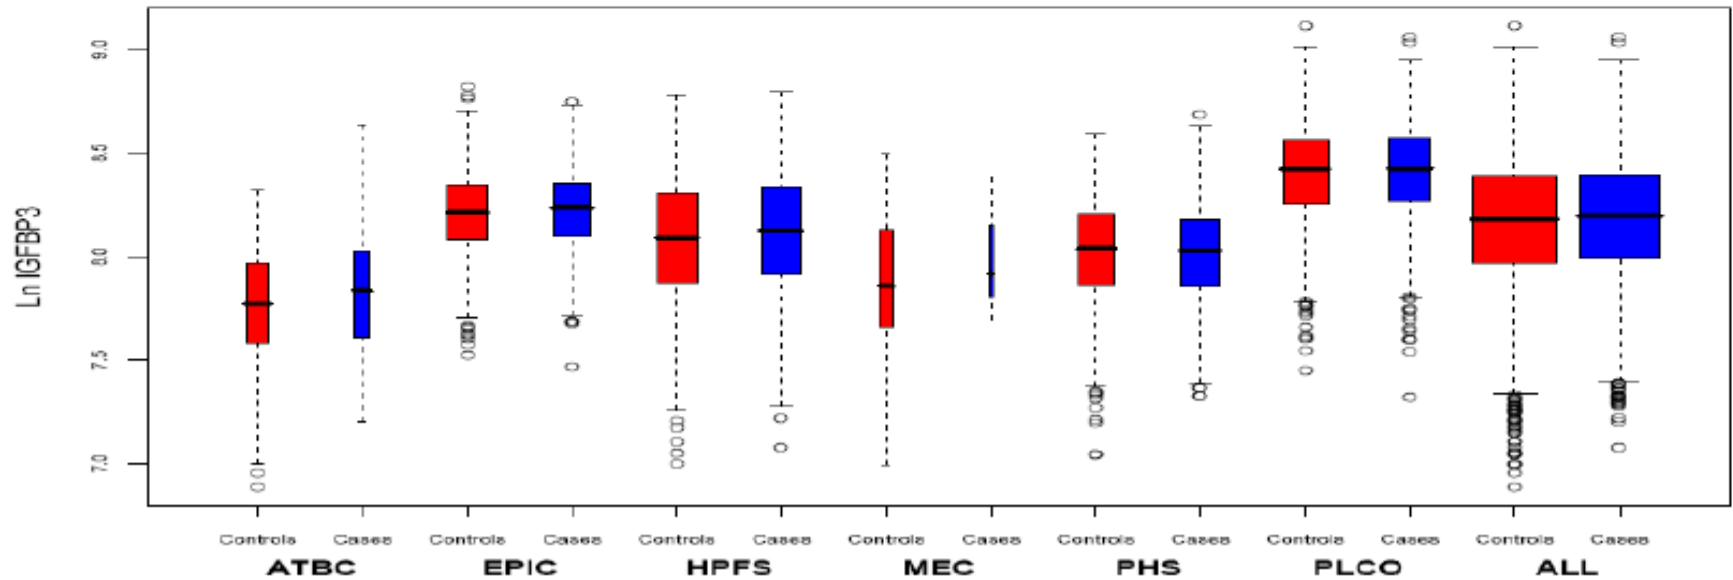

Supplement: ddq210_1.pdf [file ddq210_1.pdf]
